# Supplementary material for: Structural basis for the glycosyltransferase activity of the Salmonella effector SseK3
Source: PubMed Central journal article supplement (PMC5892559; doi:10.1074/jbc.ra118.001796), 2018-02-15
Supplement: supp_RA118.001796_135139_1_supp_65978_p3f96k.pdf [file supp_RA118.001796_135139_1_supp_65978_p3f96k.pdf]

Supporting Information  
for

**Structural basis for the glycosyltransferase activity of the Salmonella effector SseK3**

Diego Esposito, Regina A. Gunster, Luigi Martino, Kamel El Omari, Armin Wagner, Teresa L. M. Thurston, Katrin Rittinger

|                                                                         |     |
|-------------------------------------------------------------------------|-----|
| Figure S1. Binding affinity of UDP-GlcNAc for SseK3 <sub>14-335</sub> . | S-2 |
| Figure S2. Structural features of SseK3 and its ligand.                 | S-3 |
| Figure S3. UDP-GlcNAc hydrolysis by NMR.                                | S-4 |
| Figure S4. Arg-GlcNacylation gel assay of SseK3 mutants.                | S-5 |
| Figure S5. Sequence conservation in the SseK family                     | S-6 |

## UDP-GlcNAc

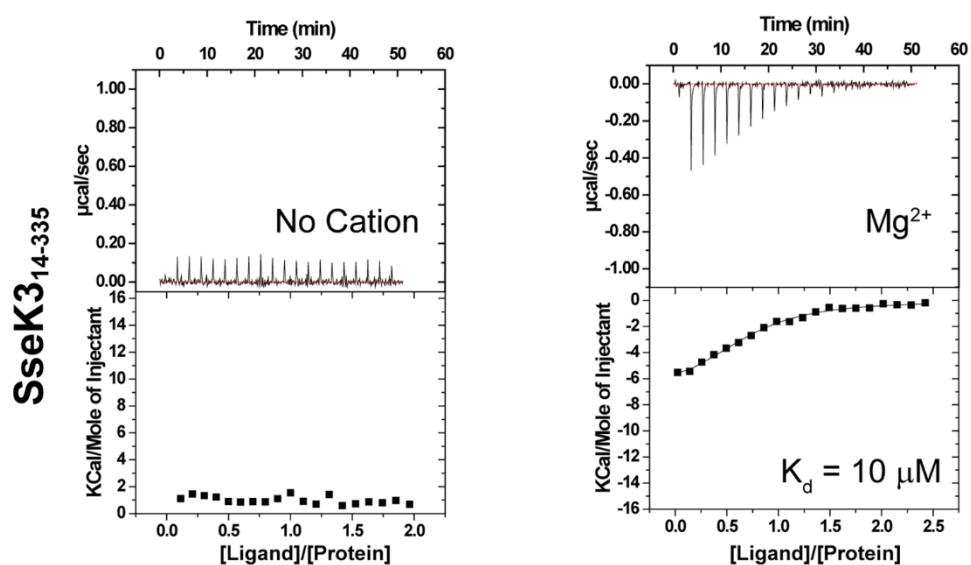

**Figure S1.** The presence of a divalent cation is necessary for binding of UDP-GlcNAc to SseK3. Isothermal Titration Calorimetry curves for the interaction of SseK3<sub>14-335</sub> with UDP-Glucosamine (UDP-GlcNAc) in the absence of coordinating divalent cation (left panel) and in the presence of 5 mM MgCl<sub>2</sub> (right panel). The integrated heat for the binding interaction was integrated as a function of the molar ratio of titrant to protein in the cell. The data was fitted to a 1:1 binding model and the dissociation constant is reported in each panel.

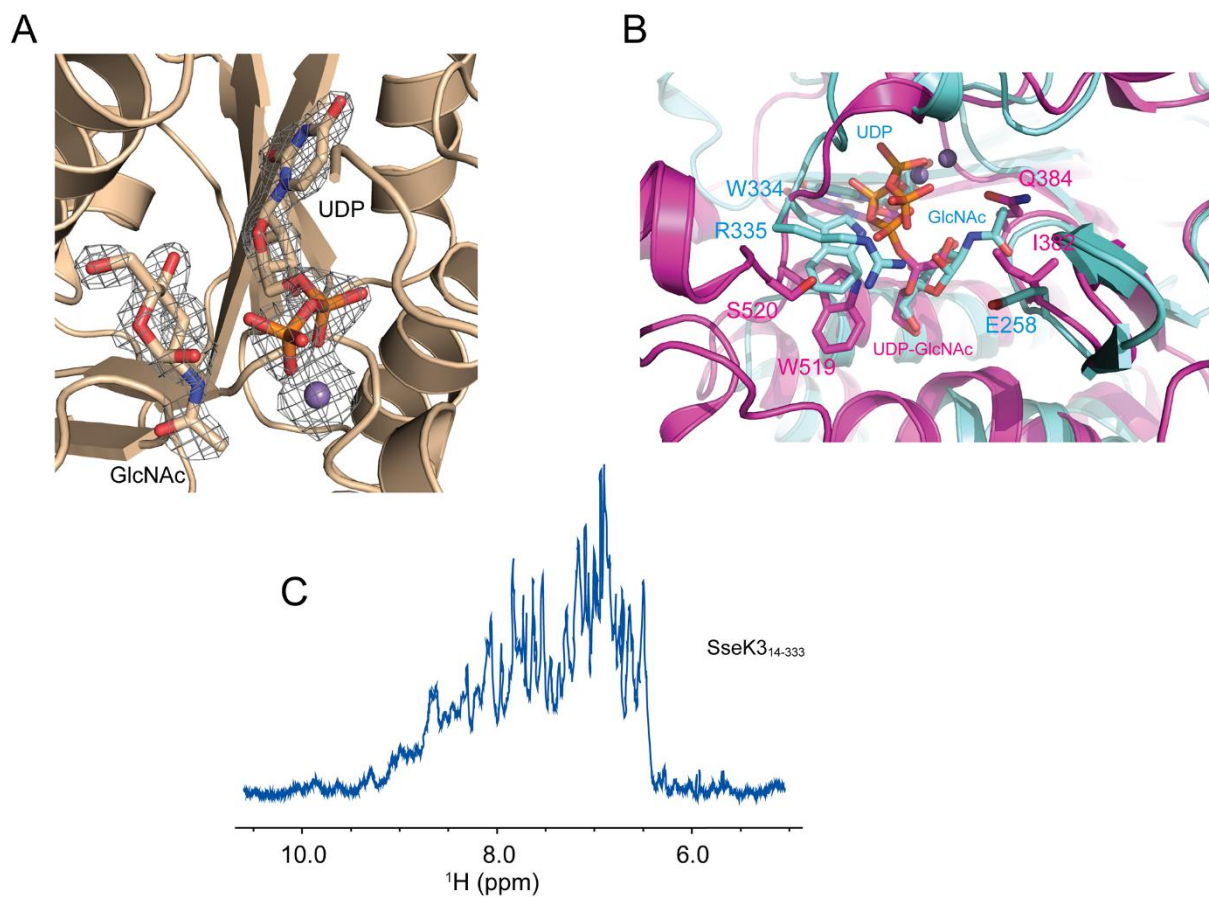

**Figure S2.** Ligand binding to SseK3. (A) 2Fo-Fc electronic density map around UDP and GlcNAc in the active site pocket of SseK3<sub>14-335</sub>. The map is plotted at  $2\sigma$  around the UDP and  $1\sigma$  around the N-acetyl  $\alpha$ -D-glucosamine. (B) Overlap of the structure of the active site of *C. difficile* toxin A (PDB code 3SRZ) with its ligand UDP-Glucose (magenta) and SseK3 with UDP/GlcNAc (cyan). Residues in the different chains are coloured accordingly. (C) Downfield region of the proton NMR spectra of SseK3<sub>14-333</sub>.

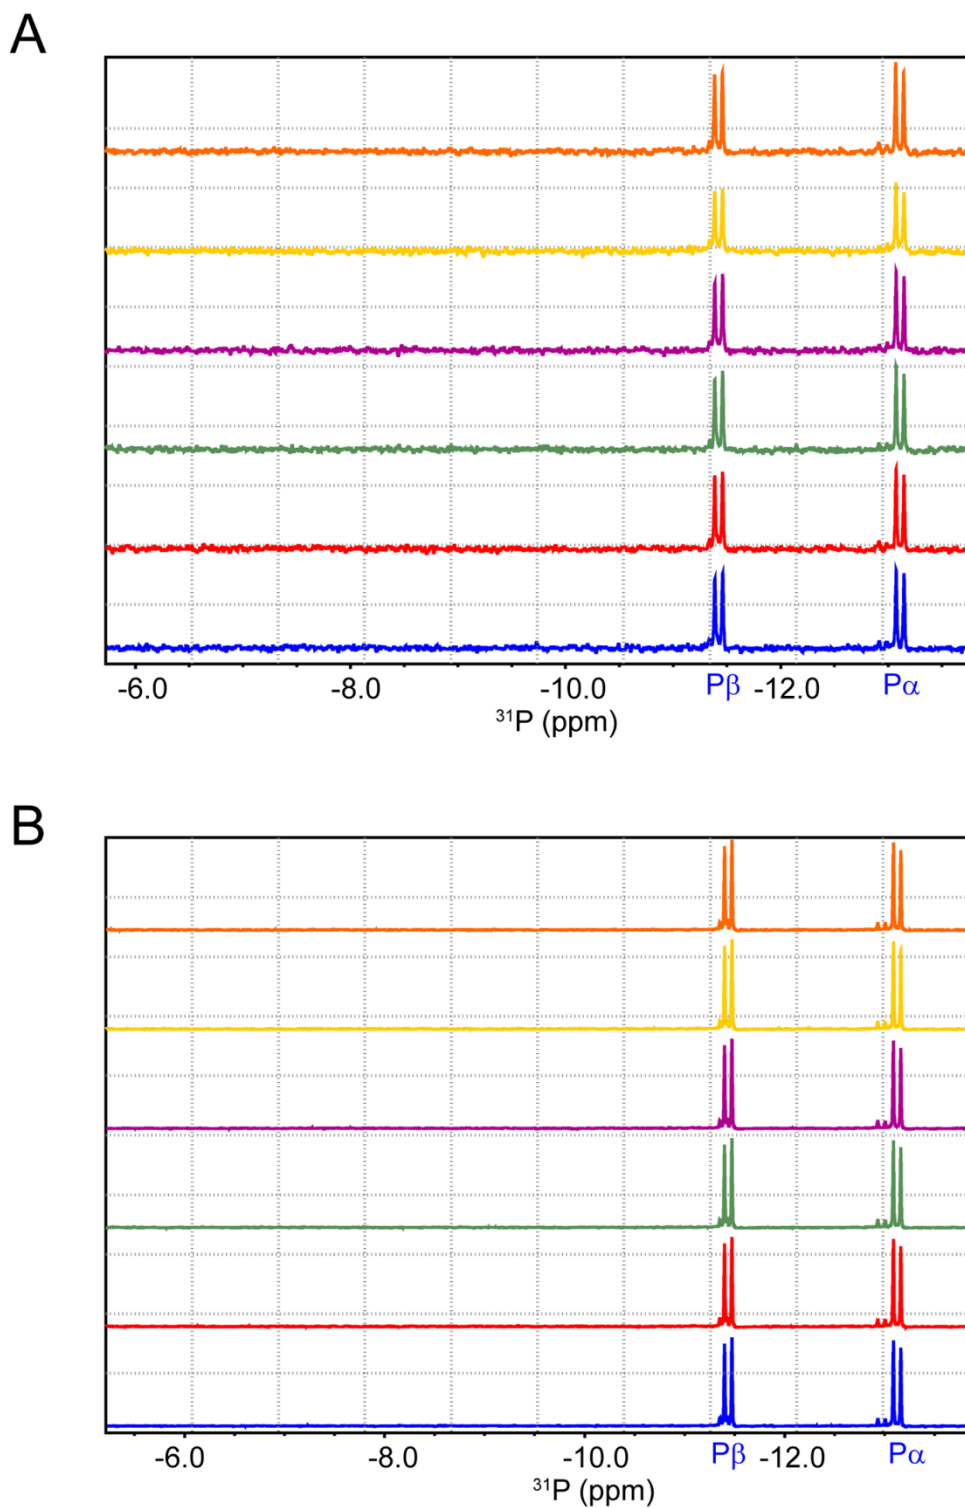

**Figure S3.** Ligand hydrolysis by SseK<sub>14-333</sub>.  $^{31}\text{P}$  NMR spectra of a 500  $\mu\text{M}$  solution of UDP-GlcNAC in the presence (A) and absence (B) of 10  $\mu\text{M}$  SseK<sub>14-333</sub>. The spectra were recorded at different time points: 0 min (blue), 5 min (red), 15 min (green), 30 min (purple), 90 min (yellow) and 12 hours (orange). The UDP-GlcNAC  $\text{P}\alpha$  and  $\text{P}\beta$  doublets are assigned in the relative spectra.

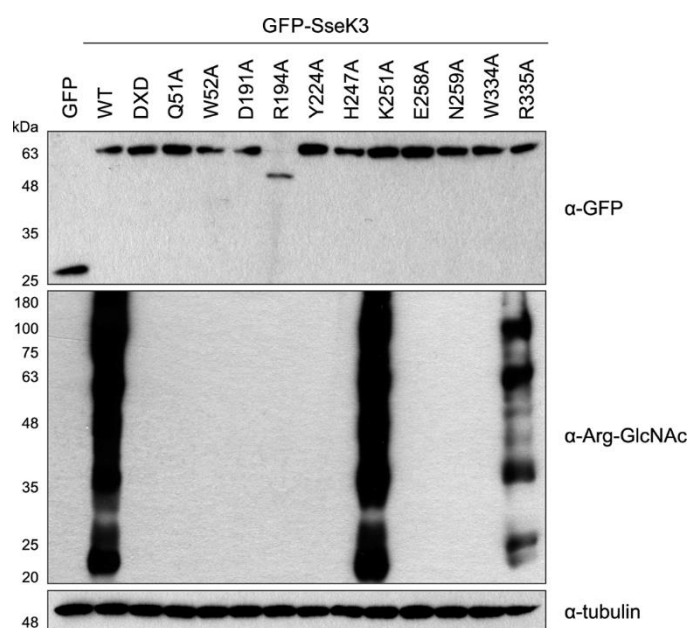

**Figure S4.** Expression of and Arg-GlcNAcylation induced by putative SseK3 catalytic mutants. 293ET whole cell lysates from Figure 5B were immunoblotted with anti-GFP antibody to test for expression of the GFP-tagged SseK3 variants during NF- $\kappa$ B reporter experiments. Lysates were also blotted with anti-Arg-GlcNAc antibody and anti-tubulin antibody as a loading control. Data shown is representative of 5 independent experiments. DXD corresponds to the SseK3 D226A/D228A mutant.

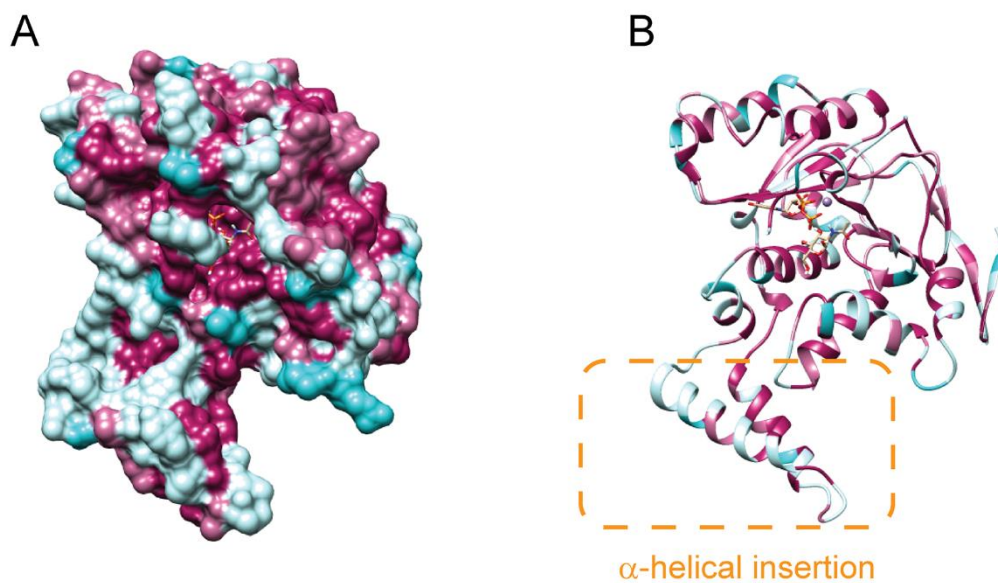

Conservation   
0.25 0.8

**Figure S5.** Sequence conservation among the SseK effector family. SseK3 solvent-accessible surface coloured according to sequence conservation among the SseK proteins and their ortholog in *E. coli* NleB. The poorly conserved  $\alpha$ -helical insertion is highlighted on the structure of SseK<sub>314</sub>.

335.
